# Supplementary material for: Elevated Level of Nerve Growth Factor (NGF) in Serum-Derived Exosomes Predicts Poor Survival in Patients with Breast Cancer Undergoing Neoadjuvant Chemotherapy
Source: MDPI journal article supplement (doi:10.3390/cancers13215260), 2021-10-20
Supplement: s1 [file s1]

# Elevated Level of Nerve Growth Factor (NGF) in Serum-Derived Exosomes Predicts Poor Survival in Patients with Breast Cancer Undergoing Neoadjuvant Chemotherapy

Hae Hyun Jung, Ji-Yeon Kim, Eun Yoon Cho, Jung Min Oh, Jeong Eon Lee, Seok Won Kim, Seok Jin Nam, Yeon Hee Park, Jin Seok Ahn and Young-Hyuck Im

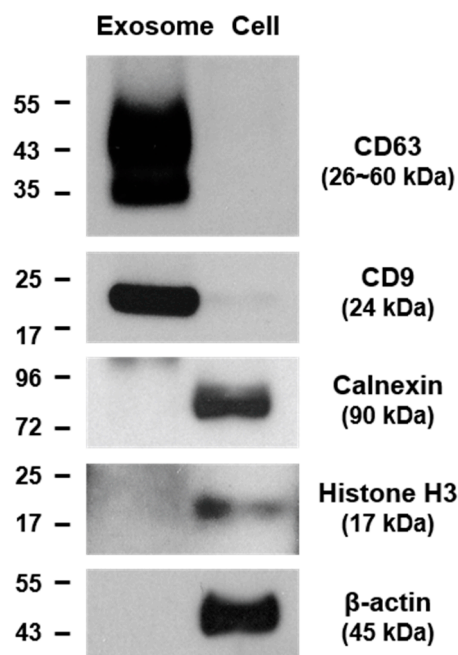

**Figure S1.** Characterization of exosome preparation by Western blot. Exosomes were isolated as described in Section 2.2. in Materials and Methods. The lysate of MDA-MB-231 cell line was loaded as control. The equal amounts of protein samples (10  $\mu$ g protein) were subjected to SDS-PAGE, followed by immunoblot with the indicated antibodies. The presence of exosomal markers (CD63 and CD9), and the absence of non-exosomal markers (Calnexin, Histone H3, and  $\beta$ -actin) demonstrates a pure exosome preparation.

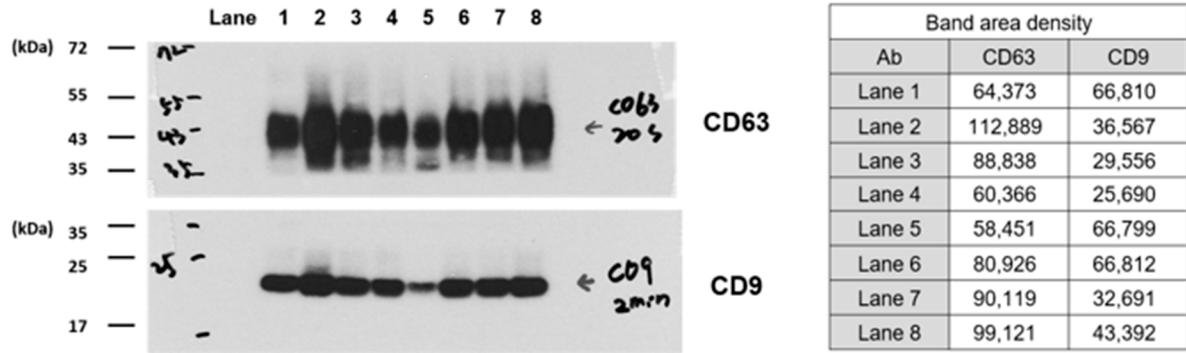

Figure S2. Uncut blots for Figure 1E.

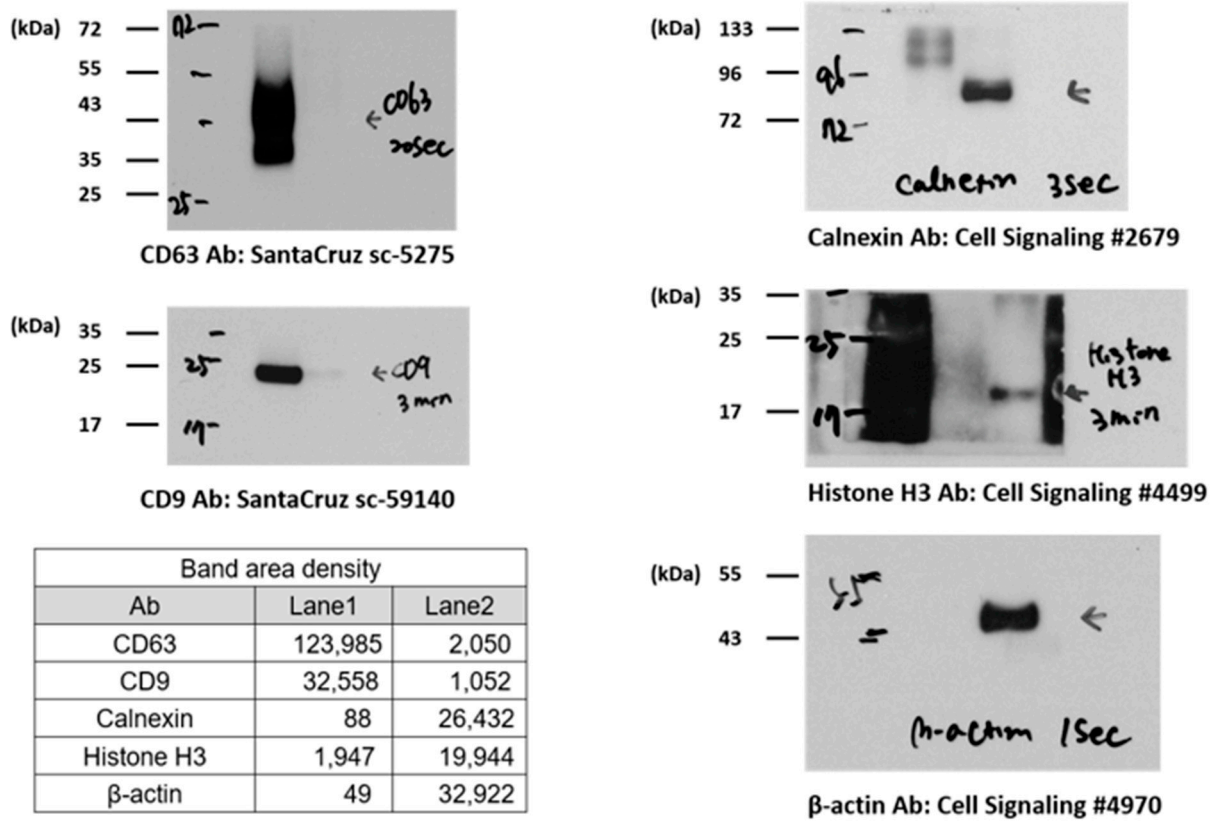

Figure S3. Uncut blots for Figure S1.

**Table S1.** Full name for each target in the ProcartaPlex immune-related Panel.

| Analyte     | Gene Name<br>(HGNC) | Protein Name<br>(Uniprot)                            | Exosomes<br>(Mean $\pm$ SD) | Serum<br>(Mean $\pm$ SD) |
|-------------|---------------------|------------------------------------------------------|-----------------------------|--------------------------|
| APRIL       | TNFSF13             | Tumor necrosis factor ligand superfamily member 13   | 212.1 $\pm$ 224.9           | 933.8 $\pm$ 727.4        |
| BAFF        | TNFSF13B            | Tumor necrosis factor ligand superfamily member 13B  | 5.5 $\pm$ 4.5               | 0.6 $\pm$ 2.1            |
| BLC         | CXCL13              | C-X-C motif chemokine 13                             | 13.5 $\pm$ 8                | 65.1 $\pm$ 36.6          |
| BTLA        | BTLA                | B- and T-lymphocyte attenuator                       | 151.4 $\pm$ 155             | 205.5 $\pm$ 138.4        |
| CD137/4-1BB | TNFRSF9             | Tumor necrosis factor receptor superfamily member 9  | 1.1 $\pm$ 3.7               | 2.7 $\pm$ 6.5            |
| CD152       | CTLA4               | Cytotoxic T-lymphocyte protein 4                     | 30.6 $\pm$ 46.9             | 4.9 $\pm$ 8.3            |
| CD27        | CD27                | CD27 antigen                                         | 27.8 $\pm$ 47.9             | 152.5 $\pm$ 130.8        |
| CD28        | CD28                | T-cell-specific surface glycoprotein CD28            | 543.2 $\pm$ 1349.4          | 21 $\pm$ 95.8            |
| CD30        | TNFRSF8             | Tumor necrosis factor receptor superfamily member 8  | 1.7 $\pm$ 2.2               | 170.2 $\pm$ 137          |
| CD40L       | CD40LG              | CD40 ligand                                          | 1.3 $\pm$ 6.3               | 20.6 $\pm$ 22.6          |
| CD80        | CD80                | T-lymphocyte activation antigen CD80                 | 19.9 $\pm$ 20.3             | 144 $\pm$ 106.7          |
| ENA-78      | CXCL5               | C-X-C motif chemokine 5                              | 0.7 $\pm$ 1.4               | 134.3 $\pm$ 112.9        |
| Eotaxin     | CCL11               | Eotaxin                                              | 0.8 $\pm$ 0.7               | 44.2 $\pm$ 23.7          |
| Eotaxin-2   | CCL24               | C-C motif chemokine 24                               | 12.5 $\pm$ 9.3              | 64.9 $\pm$ 31.2          |
| Eotaxin-3   | CCL26               | C-C motif chemokine 26                               | 28.3 $\pm$ 34.7             | 0.1 $\pm$ 0.3            |
| FGF-2       | FGF2                | Fibroblast growth factor 2                           | 100.1 $\pm$ 86.4            | -                        |
| Fractalkine | CX3CL1              | Fractalkine, C-X3-C motif chemokine ligand 1         | 2.5 $\pm$ 2.8               | 0.3 $\pm$ 1.2            |
| G-CSF       | CSF3                | Granulocyte colony-stimulating factor                | 324.8 $\pm$ 381.1           | 0.4 $\pm$ 2.5            |
| GITR        | TNFRSF18            | Tumor necrosis factor receptor superfamily member 18 | 8.7 $\pm$ 8.4               | 0.4 $\pm$ 1.8            |
| GM-CSF      | CSF2                | Granulocyte-macrophage colony-stimulating factor     | 7.2 $\pm$ 11.4              | 1.8 $\pm$ 15.1           |
| GRO-alpha   | CXCL1               | Growth-regulated alpha protein                       | 23.8 $\pm$ 25.8             | 0.3 $\pm$ 2.9            |
| HGF         | HGF                 | Hepatocyte growth factor                             | 4.3 $\pm$ 4.1               | 71.4 $\pm$ 63.9          |
| HVEM        | TNFRSF14            | Tumor necrosis factor receptor superfamily member 14 | 378.1 $\pm$ 971             | 0.1 $\pm$ 0.9            |
| IDO         | IDO1                | Indoleamine 2,3-dioxygenase 1                        | 10.3 $\pm$ 10               | 11.5 $\pm$ 11.1          |
| IFN-alpha   |                     | Interferon alpha                                     | 1.5 $\pm$ 1.2               | 0.1 $\pm$ 0.4            |
| IFN-gamma   | IFNG                | Interferon gamma                                     | 2.2 $\pm$ 2.1               | 3.2 $\pm$ 3.9            |
| IL-1 alpha  | IL1A                | Interleukin-1 alpha                                  | 7.6 $\pm$ 5.1               | 0.7 $\pm$ 5.8            |
| IL-1 beta   | IL1B                | Interleukin-1 beta                                   | 7.8 $\pm$ 7.8               | 4.6 $\pm$ 4.9            |
| IL-10       | IL10                | Interleukin-10                                       | 2.9 $\pm$ 3                 | -                        |
| IL-12p70    |                     | Interleukin 12p70                                    | 1.2 $\pm$ 0.9               | 1.4 $\pm$ 0.9            |
| IL-13       | IL13                | Interleukin-13                                       | 0.6 $\pm$ 0.8               | 0.1 $\pm$ 0.1            |
| IL-15       | IL15                | Interleukin-15                                       | 12.5 $\pm$ 5.1              | 0.5 $\pm$ 1.4            |
| IL-16       | IL16                | Pro-interleukin-16                                   | 26 $\pm$ 19.2               | 155.3 $\pm$ 86.5         |
| IL-17A      | IL17A               | Interleukin-17A                                      | 3.2 $\pm$ 4.3               | 2.2 $\pm$ 6.6            |
| IL-18       | IL18                | Interleukin-18                                       | 4.4 $\pm$ 4.9               | 7.2 $\pm$ 11.5           |
| IL-2        | IL2                 | Interleukin-2                                        | 2.2 $\pm$ 3.3               | 3.8 $\pm$ 11.4           |
| IL-20       | IL20                | Interleukin-20                                       | 2.2 $\pm$ 10                | 3.5 $\pm$ 30.2           |
| IL-21       | IL21                | Interleukin-21                                       | 18 $\pm$ 13.2               | 0.7 $\pm$ 3.7            |
| IL-22       | IL22                | Interleukin-22                                       | 36.8 $\pm$ 24.5             | 1.1 $\pm$ 5.9            |
| IL-23       |                     | Interleukin-23                                       | 2968.2 $\pm$ 6362.5         | -                        |
| IL-27       |                     | Interleukin-27                                       | 4 $\pm$ 12.2                | -                        |
| IL-2R       |                     | Interleukin-2 receptor                               | 775.4 $\pm$ 464.5           | 175.1 $\pm$ 657.4        |
| IL-3        | IL3                 | Interleukin-3                                        | 20 $\pm$ 25.2               | 0.5 $\pm$ 3.5            |
| IL-31       | IL31                | Interleukin-31                                       | 66 $\pm$ 77.2               | -                        |
| IL-4        | IL4                 | Interleukin-4                                        | 44.5 $\pm$ 51.7             | -                        |
| IL-5        | IL5                 | Interleukin-5                                        | 15.5 $\pm$ 18.8             | -                        |
| IL-6        | IL6                 | Interleukin-6                                        | 6.7 $\pm$ 7.9               | -                        |
| IL-7        | IL7                 | Interleukin-7                                        | 0.1 $\pm$ 0.2               | 0.5 $\pm$ 0.8            |
| IL-8        | CXCL8               | Interleukin-8                                        | 5.8 $\pm$ 7.3               | 0.1 $\pm$ 0.3            |
| IL-9        | IL9                 | Interleukin-9                                        | 16.3 $\pm$ 22.1             | -                        |
| IP-10       | CXCL10              | C-X-C motif chemokine 10                             | 3.7 $\pm$ 2.1               | 35.4 $\pm$ 23.1          |
| I-TAC       | CXCL11              | C-X-C motif chemokine 11                             | 6.9 $\pm$ 15                | 8.3 $\pm$ 29.7           |

|             |          |                                                      |               |                |
|-------------|----------|------------------------------------------------------|---------------|----------------|
| LAG-3       | LAG3     | Lymphocyte activation gene 3 protein                 | 2.9 ± 4.8     | 22.1 ± 19.5    |
| LIF         | LIF      | Leukemia inhibitory factor                           | 0.4 ± 0.8     | 0.1 ± 0.3      |
| MCP-1       | CCL2     | C-C motif chemokine 2                                | 0.5 ± 1       | 48.3 ± 26.9    |
| MCP-2       | CCL8     | C-C motif chemokine 8                                | 0.1 ± 0.2     | 8.2 ± 4.6      |
| MCP-3       | CCL7     | C-C motif chemokine 7                                | 19.2 ± 10     | 3.1 ± 7        |
| M-CSF       | CSF1     | Macrophage colony-stimulating factor 1               | 149.6 ± 202.9 | 0.4 ± 4.5      |
| MDC         | CCL22    | C-C motif chemokine 22                               | 32.3 ± 38.8   | 111 ± 51       |
| MIF         | MIF      | Macrophage migration inhibitory factor               | 13.9 ± 10.5   | 45.2 ± 13.5    |
| MIG         | CXCL9    | C-X-C motif chemokine 9                              | 10.6 ± 13.9   | 6.2 ± 26.9     |
| MIP-1 alpha | CCL3     | C-C motif chemokine 3                                | 0.5 ± 0.9     | 1.1 ± 2.4      |
| MIP-1 beta  | CCL4     | C-C motif chemokine 4                                | 0.3 ± 1.4     | 20.7 ± 25      |
| MIP-3 alpha | CCL20    | C-C motif chemokine 20                               | 35 ± 68.3     | 16 ± 9.7       |
| MMP-1       | MMP1     | Interstitial collagenase                             | 0.5 ± 0.7     | 322.7 ± 351.4  |
| NGF beta    | NGF      | Beta-nerve growth factor                             | 16.8 ± 9.1    | 0.5 ± 5        |
| PD-1        | PDCD1    | Programmed cell death protein 1                      | 0.7 ± 1.8     | 11.3 ± 10.9    |
| PD-L1       | CD274    | Programmed cell death 1 ligand 1                     | 1 ± 1.1       | 0.6 ± 0.8      |
| PD-L2       | PDCD1LG2 | Programmed cell death 1 ligand 2                     | 16.4 ± 15.1   | 1730.5 ± 719.7 |
| SCF         | KITLG    | Kit ligand                                           | 2.1 ± 2.1     | 11.2 ± 7.1     |
| SDF-1 alpha | CXCL12   | stromal cell-derived factor 1 alpha                  | 160.1 ± 110.5 | 604.3 ± 157.7  |
| TIM-3       | HAVCR2   | Hepatitis A virus cellular receptor 2                | 184.4 ± 270.9 | 666.1 ± 432.8  |
| TNF alpha   | TNF      | Tumor necrosis factor                                | 2.1 ± 2.3     | 2.7 ± 2.5      |
| TNF beta    | LTA      | Lymphotoxin-alpha                                    | 31.1 ± 36     | -              |
| TNF-R2      | TNFRSF1B | Tumor necrosis factor receptor superfamily member 1B | 9.8 ± 8       | 48.9 ± 20.4    |
| TRAIL       | TNFSF10  | Tumor necrosis factor ligand superfamily member 10   | 22.2 ± 16     | 2.5 ± 7.2      |
| TSLP        | TSLP     | Thymic stromal lymphopoietin                         | 2.6 ± 2.9     | 3.2 ± 2.5      |
| TWEAK       | TNFSF12  | Tumor necrosis factor ligand superfamily member 12   | 151.9 ± 90.7  | 433.5 ± 295.1  |
| VEGF-A      | VEGFA    | Vascular endothelial growth factor A                 | 54.2 ± 40.1   | 161.3 ± 153.1  |
